# Supplementary material for: Highly enhanced photocatalytic activity of WO3 thin films loaded with Pt–Ag bimetallic alloy nanoparticles
Source: Royal Society of Chemistry journal article supplement (doi:10.1039/c6ra25272a), 2017-01-01
Supplement: c6ra25272a1.pdf [file c6ra25272a1.pdf]

## Electronic Supplementary Information (ESI)

### Highly enhanced photocatalytic activity of WO<sub>3</sub> thin film loaded with Pt-Ag bimetallic alloy nanoparticles

Pengyu Dong<sup>a\*</sup>, Bairen Yang<sup>b</sup>, Chao Liu<sup>c</sup>, Fenghua Xu<sup>c</sup>, Xinguo Xi<sup>d</sup>, Guihua Hou<sup>a</sup>  
and Rong Shao<sup>d\*\*</sup>

<sup>a</sup>Key Laboratory for Advanced Technology in Environmental Protection of Jiangsu  
Province, Yancheng Institute of Technology, Yancheng 224051, P. R. China

<sup>b</sup>School of Environmental Science and Engineering, Yancheng Institute of  
Technology, Yancheng 224051, China

<sup>c</sup>School of Materials Engineering, Yancheng Institute of Technology, Yancheng  
224051, China

<sup>d</sup>Jiangsu Collaborative Innovation Center for Ecological Building Materials and  
Environmental Protection Equipments, Yancheng Institute of Technology, Yancheng  
224051, China.

\*Corresponding author: dongpy11@gmail.com

Tel.: +86-515-8829-8923; Fax.: +86-515-8829-8923.

\*\*Corresponding author: E-mail: sr@ycit.cn

## **Electrochemical Measurement**

The electrochemical impedance spectra (EIS) and Mott–Schottky (MS) plots of as-prepared pure  $\text{WO}_3$ ,  $\text{Pt}/\text{WO}_3$ ,  $\text{Ag}/\text{WO}_3$  and  $\text{Pt-Ag}/\text{WO}_3$  thin films were measured on an electrochemical analyzer (CHI660E) (Shanghai Chenhua Instruments Co., Ltd., Shanghai, China) in a standard three-compartment cell using 0.5 M  $\text{Na}_2\text{SO}_4$  (pH = 6.8) solution as the electrolyte. The surface of working electrode exposed to the electrolyte was a circular film with the geometrical surface areas of  $9 \text{ cm}^2$  ( $3 \times 3 \text{ cm}$ ). Platinum foil was used as counter electrode and  $\text{Ag}/\text{AgCl}$  electrode as the reference electrode. The EIS were measured at 0.0 V. A sinusoidal ac perturbation of 5 mV was applied to the electrode over the frequency range of  $1\text{--}10^5 \text{ Hz}$ . The MS plots were obtained at a frequency of 1 kHz.

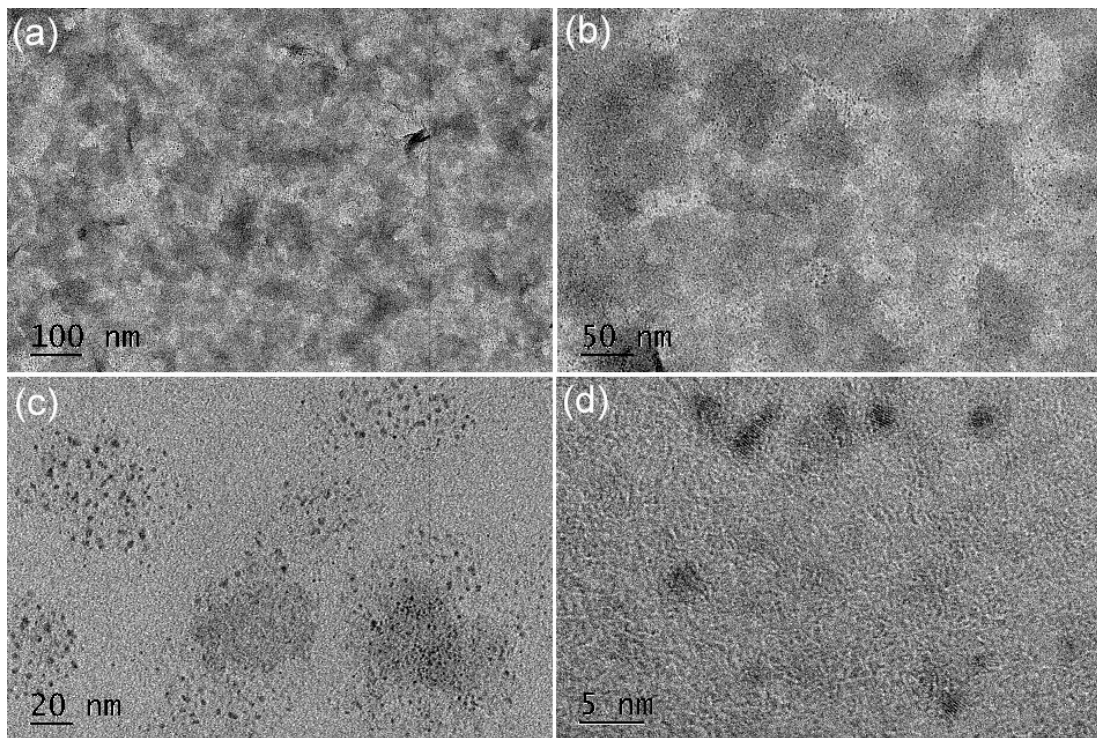

Fig. S1 TEM images of Pt-Ag/WO<sub>3</sub> sample.

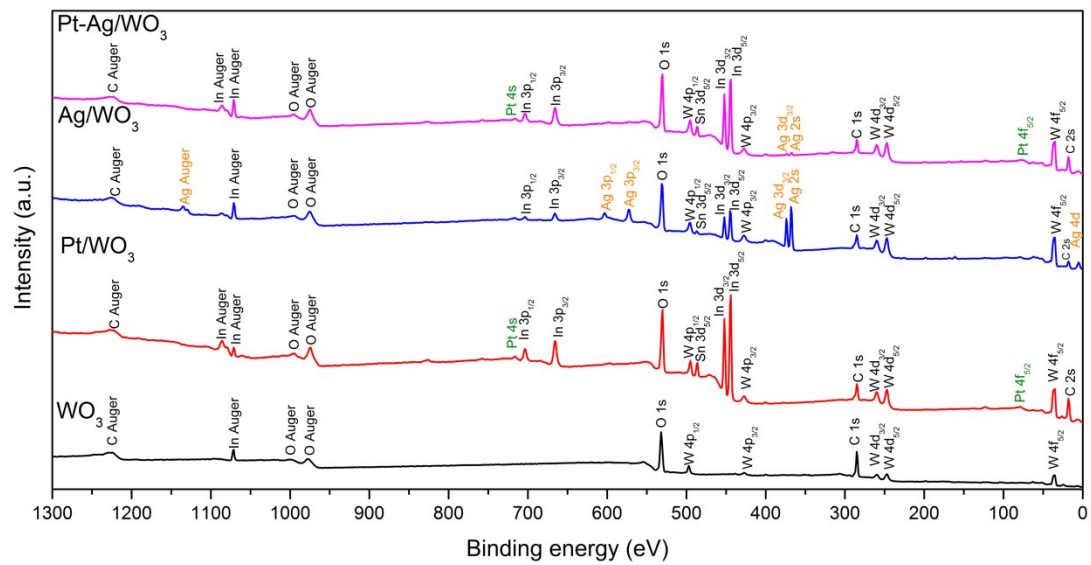

Fig. S2 The survey XPS spectra of as-prepared samples of pure WO<sub>3</sub>, Pt/WO<sub>3</sub>, Ag/WO<sub>3</sub> and Pt-Ag/WO<sub>3</sub> thin films

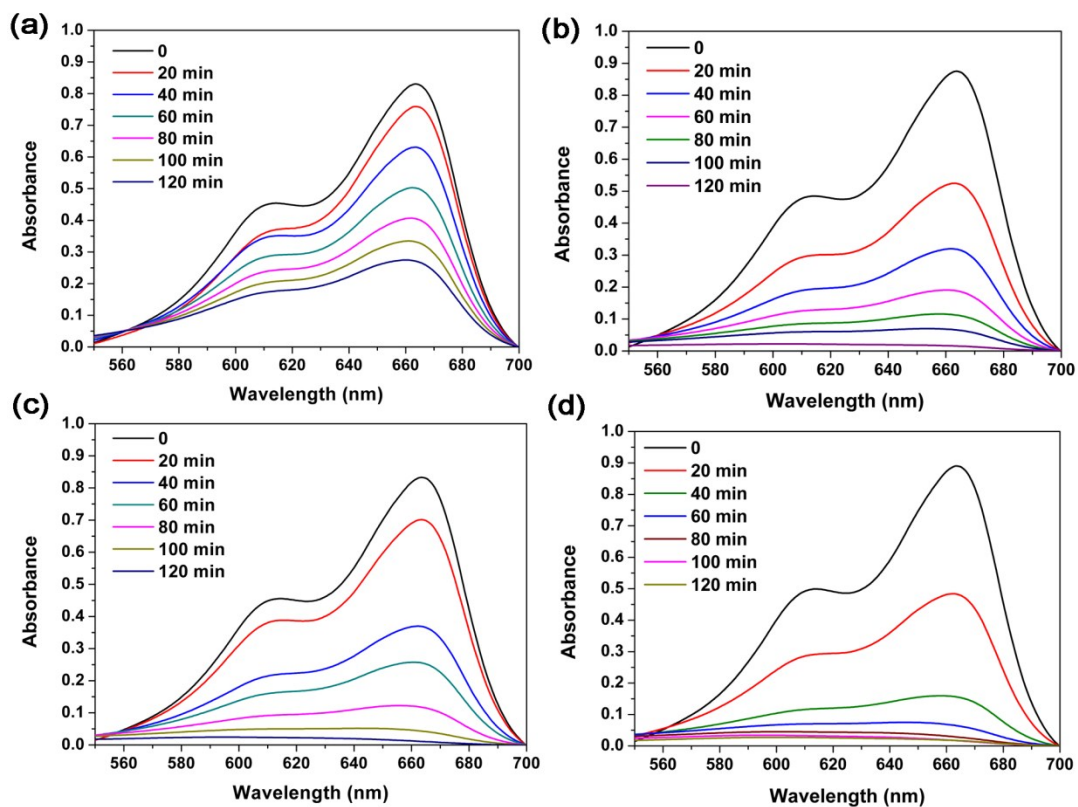

Fig. S3 UV-vis absorption spectra of MB solutions separated from the suspensions containing (a) pure  $\text{WO}_3$ , (b)  $\text{Pt}/\text{WO}_3$ , (c)  $\text{Ag}/\text{WO}_3$  and (d)  $\text{Pt-Ag}/\text{WO}_3$  thin films during illumination.
